# Supplementary material
Source: publisher figshare collection journal article supplement (https://springernature.figshare.com/ndownloader/files/27939329)

Supplementary figure S1

a Top 30 upregulated GO terms

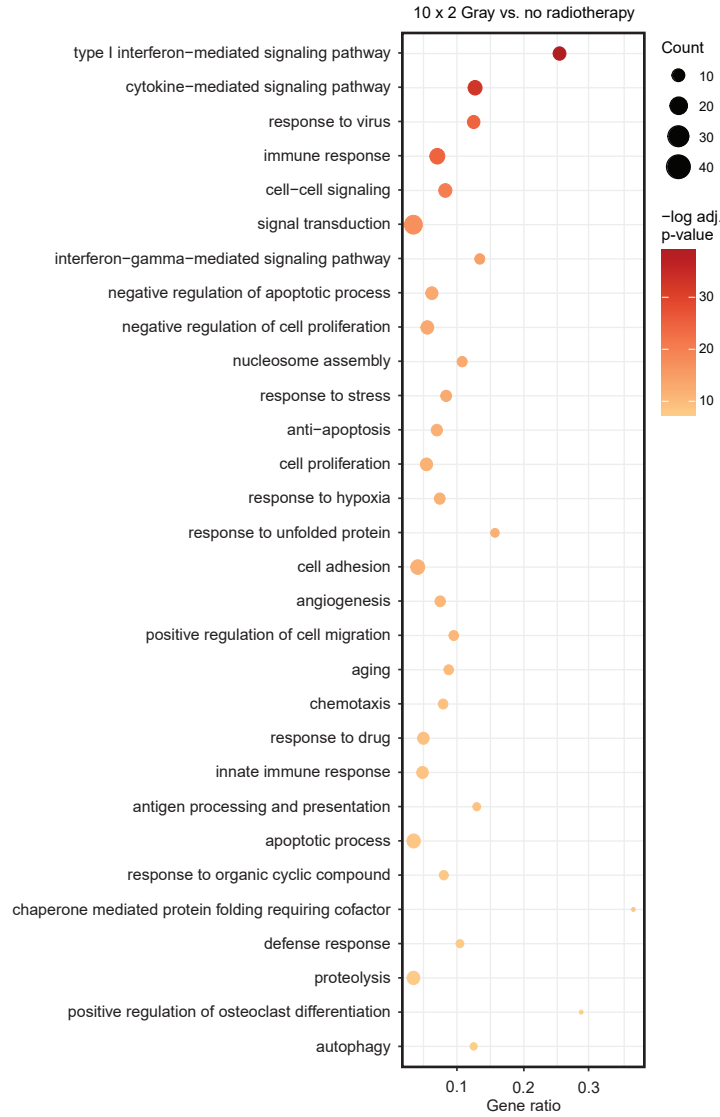

b Top 30 downregulated GO terms

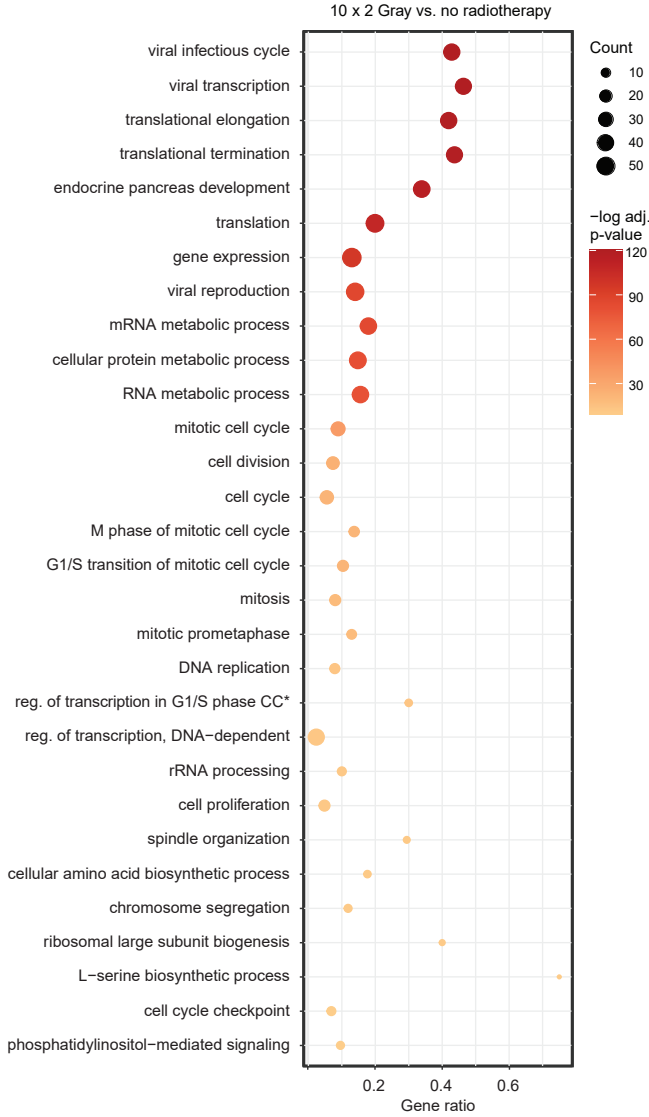

Supplement: Supplementary file 1 [file 27939329]

Supplementary figure S8

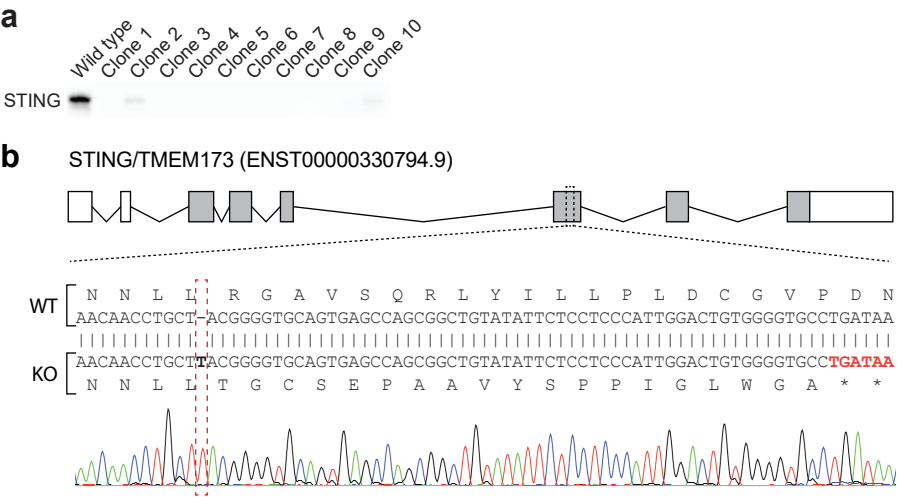

Supplement: Supplementary file 2 [file 27939329]

Supplementary figure S7

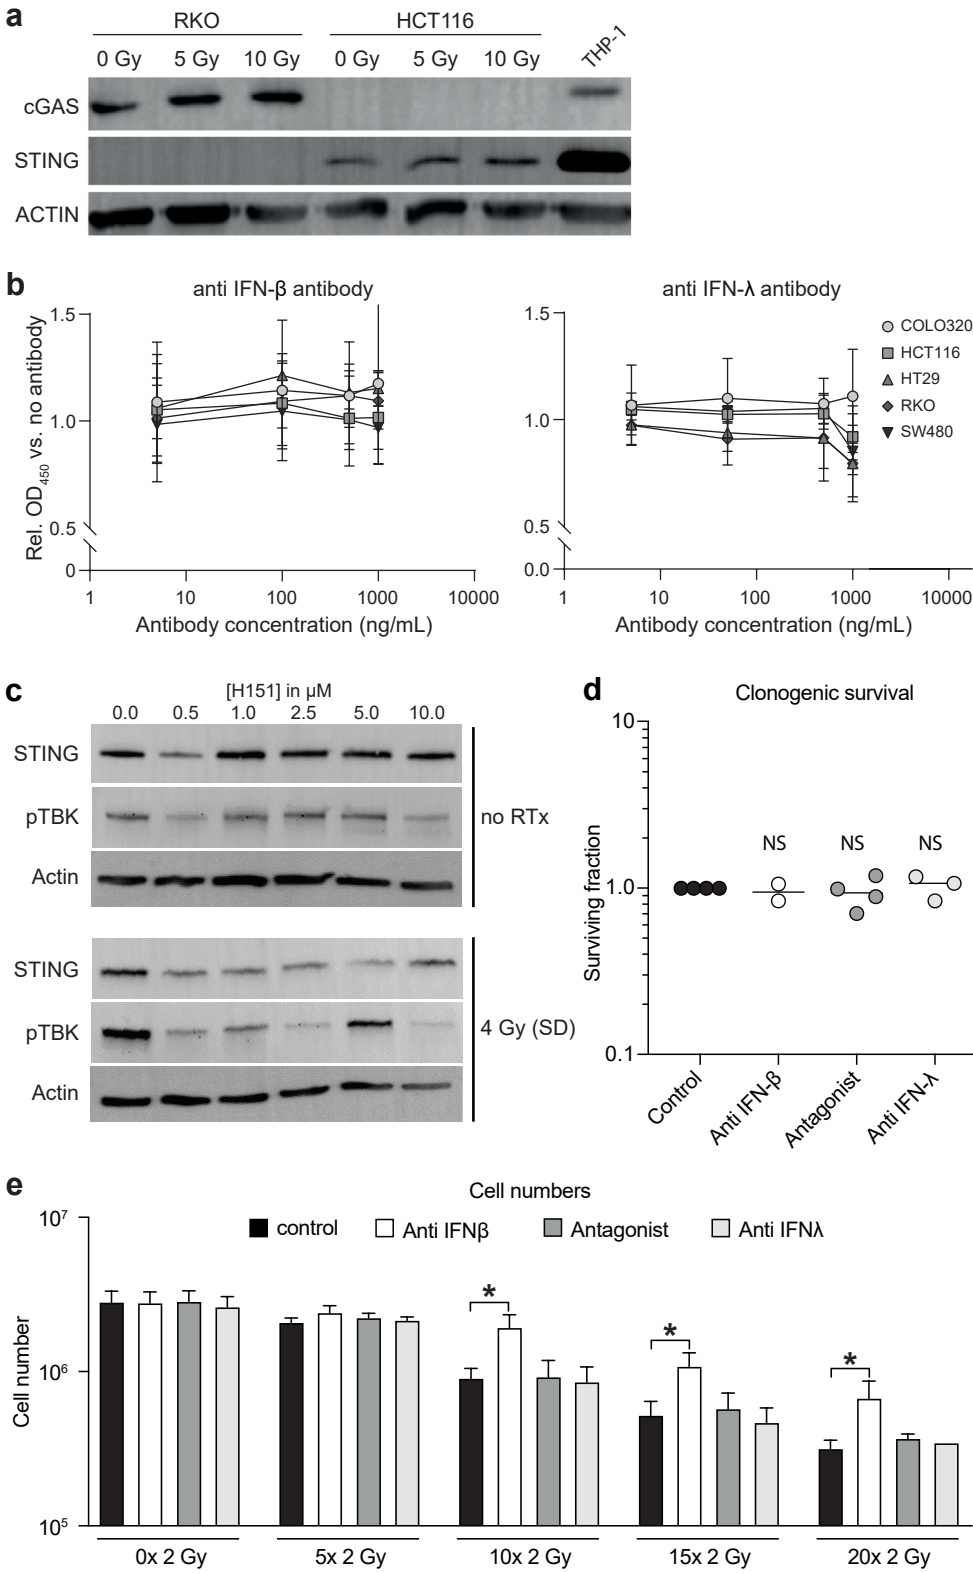

Supplement: Supplementary file 3 [file 27939329]

Supplementary figure S3

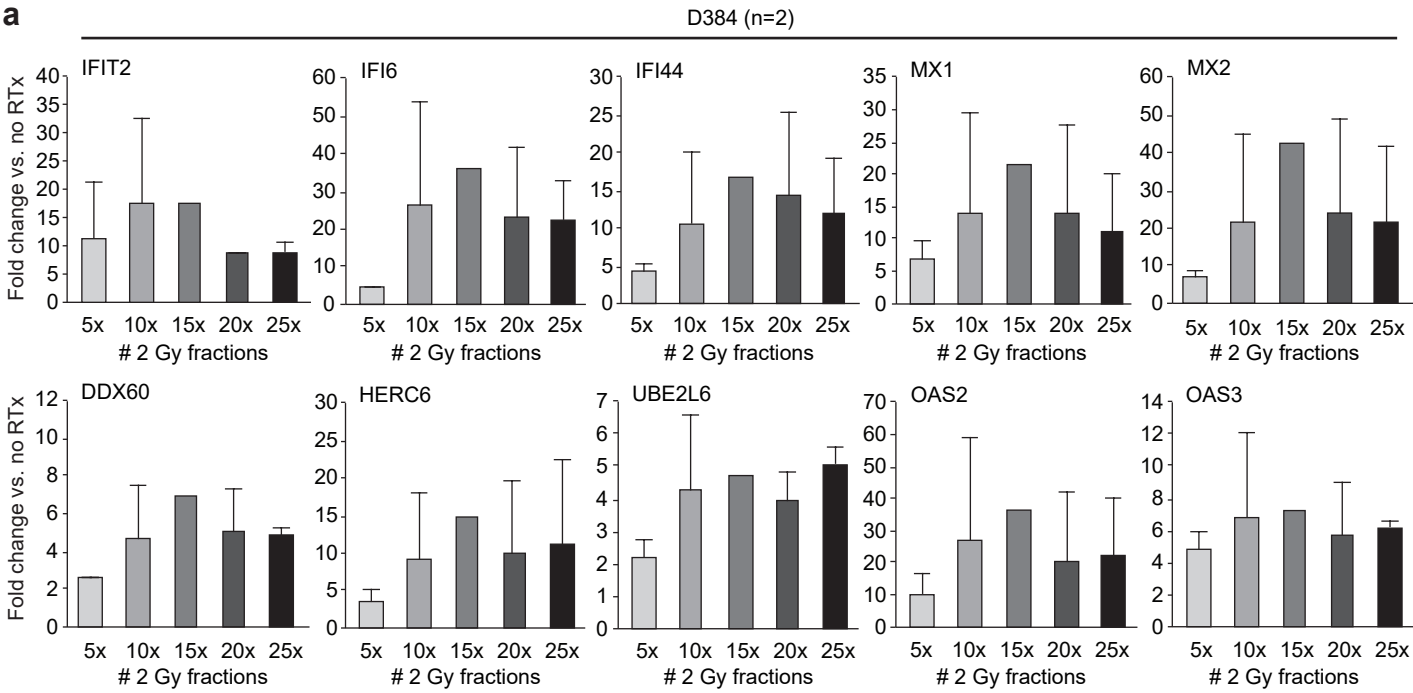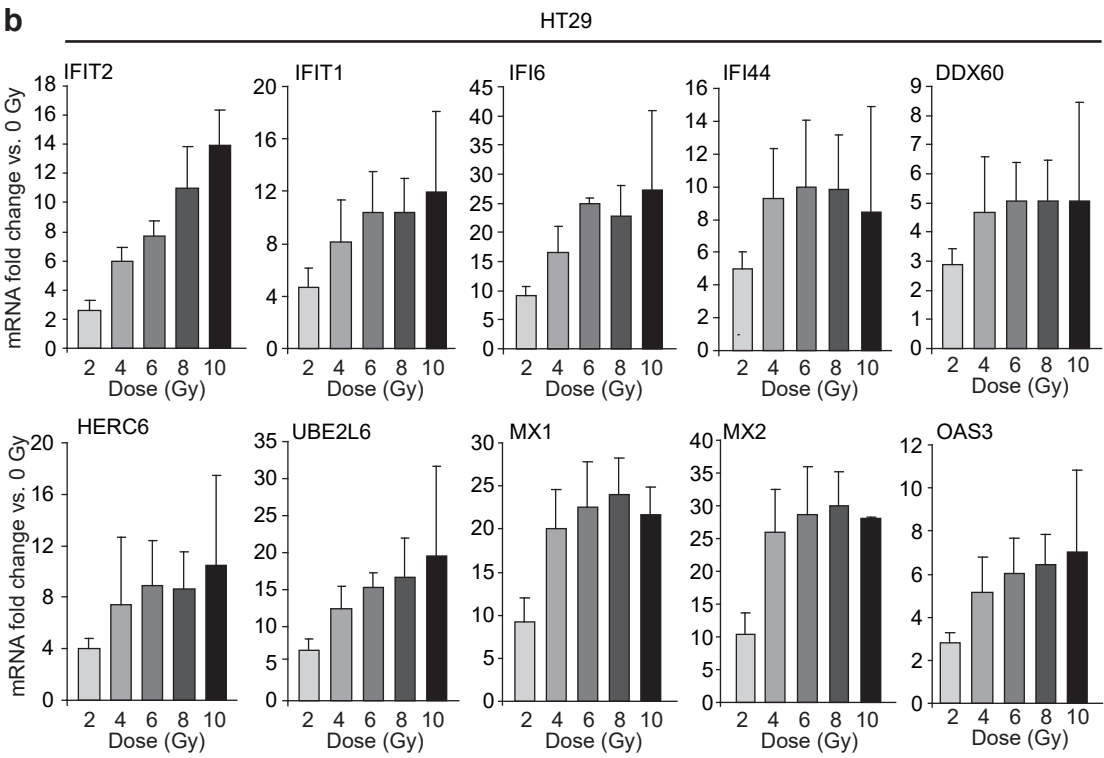

Supplement: Supplementary file 4 [file 27939329]

Supplementary figure S2

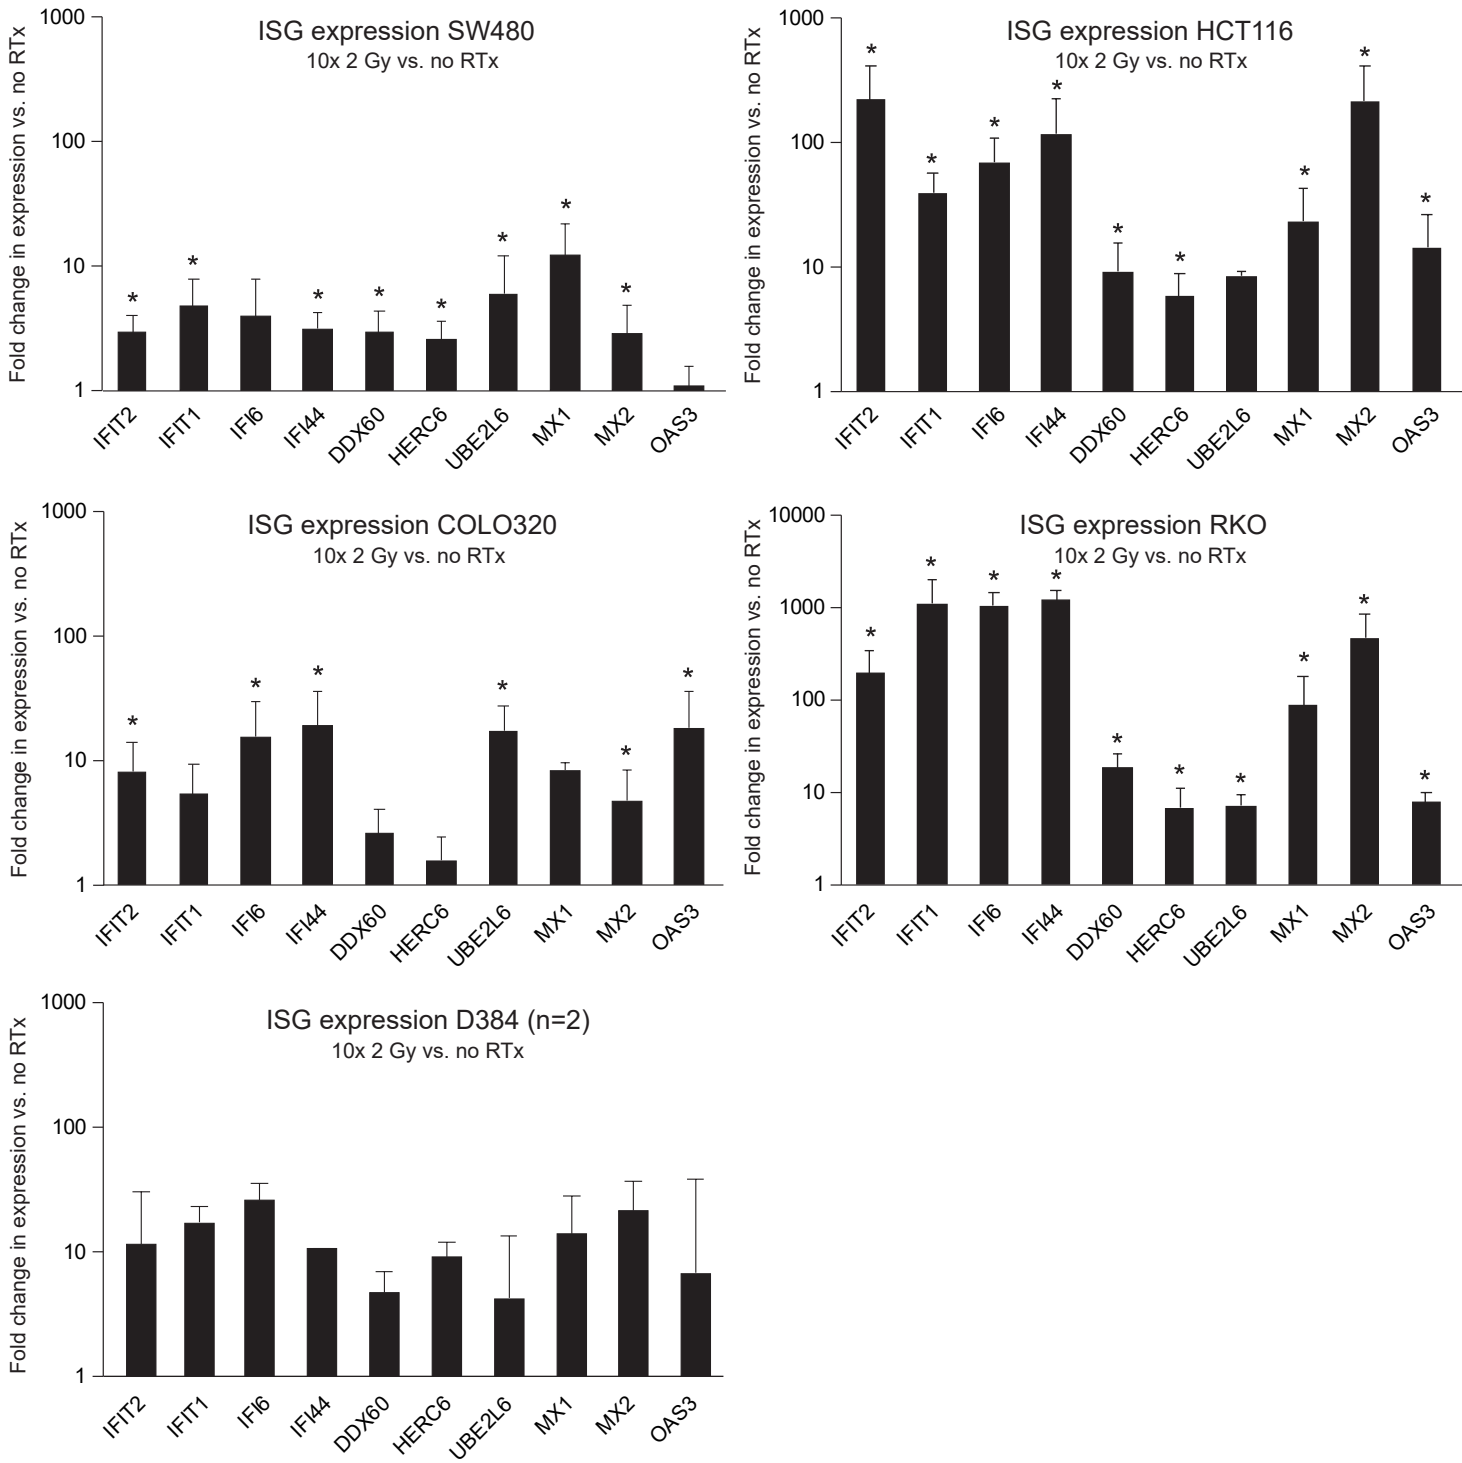

Supplement: Supplementary file 5 [file 27939329]

### Supplementary figure S6

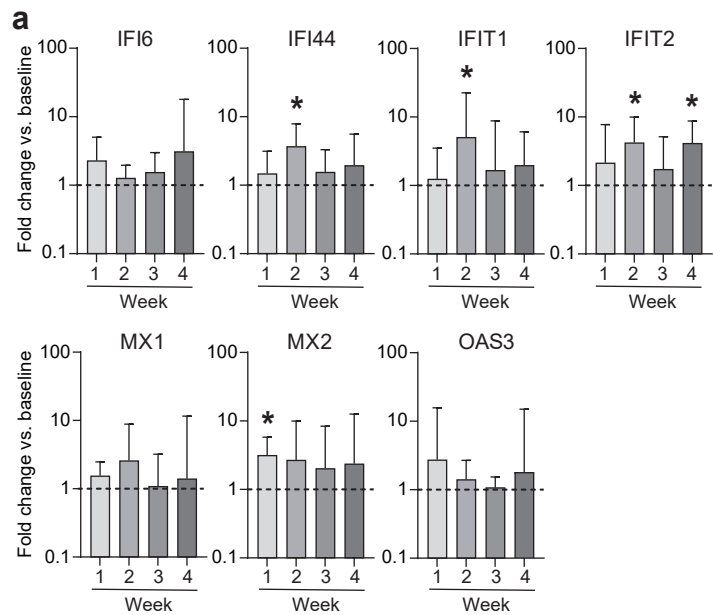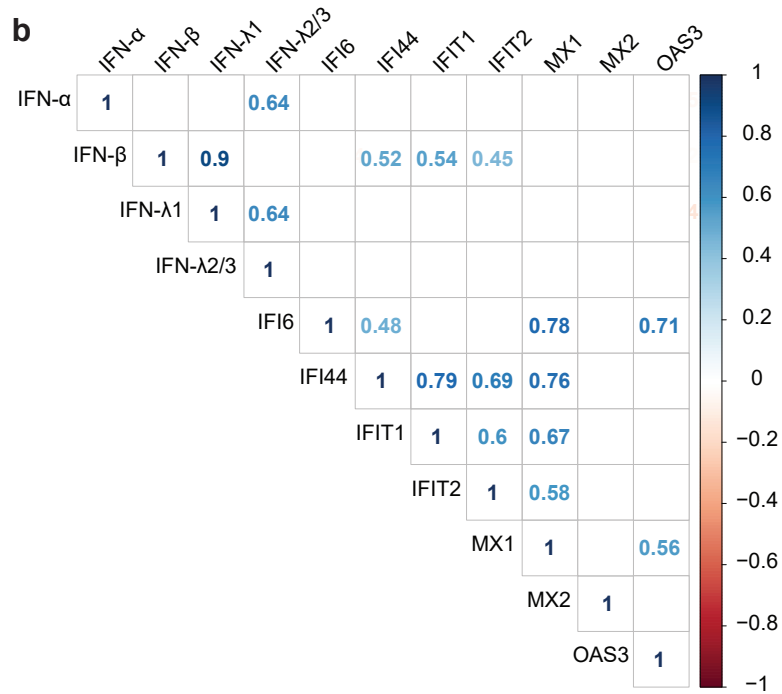

Supplement: Supplementary file 6 [file 27939329]

Supplementary figure S4

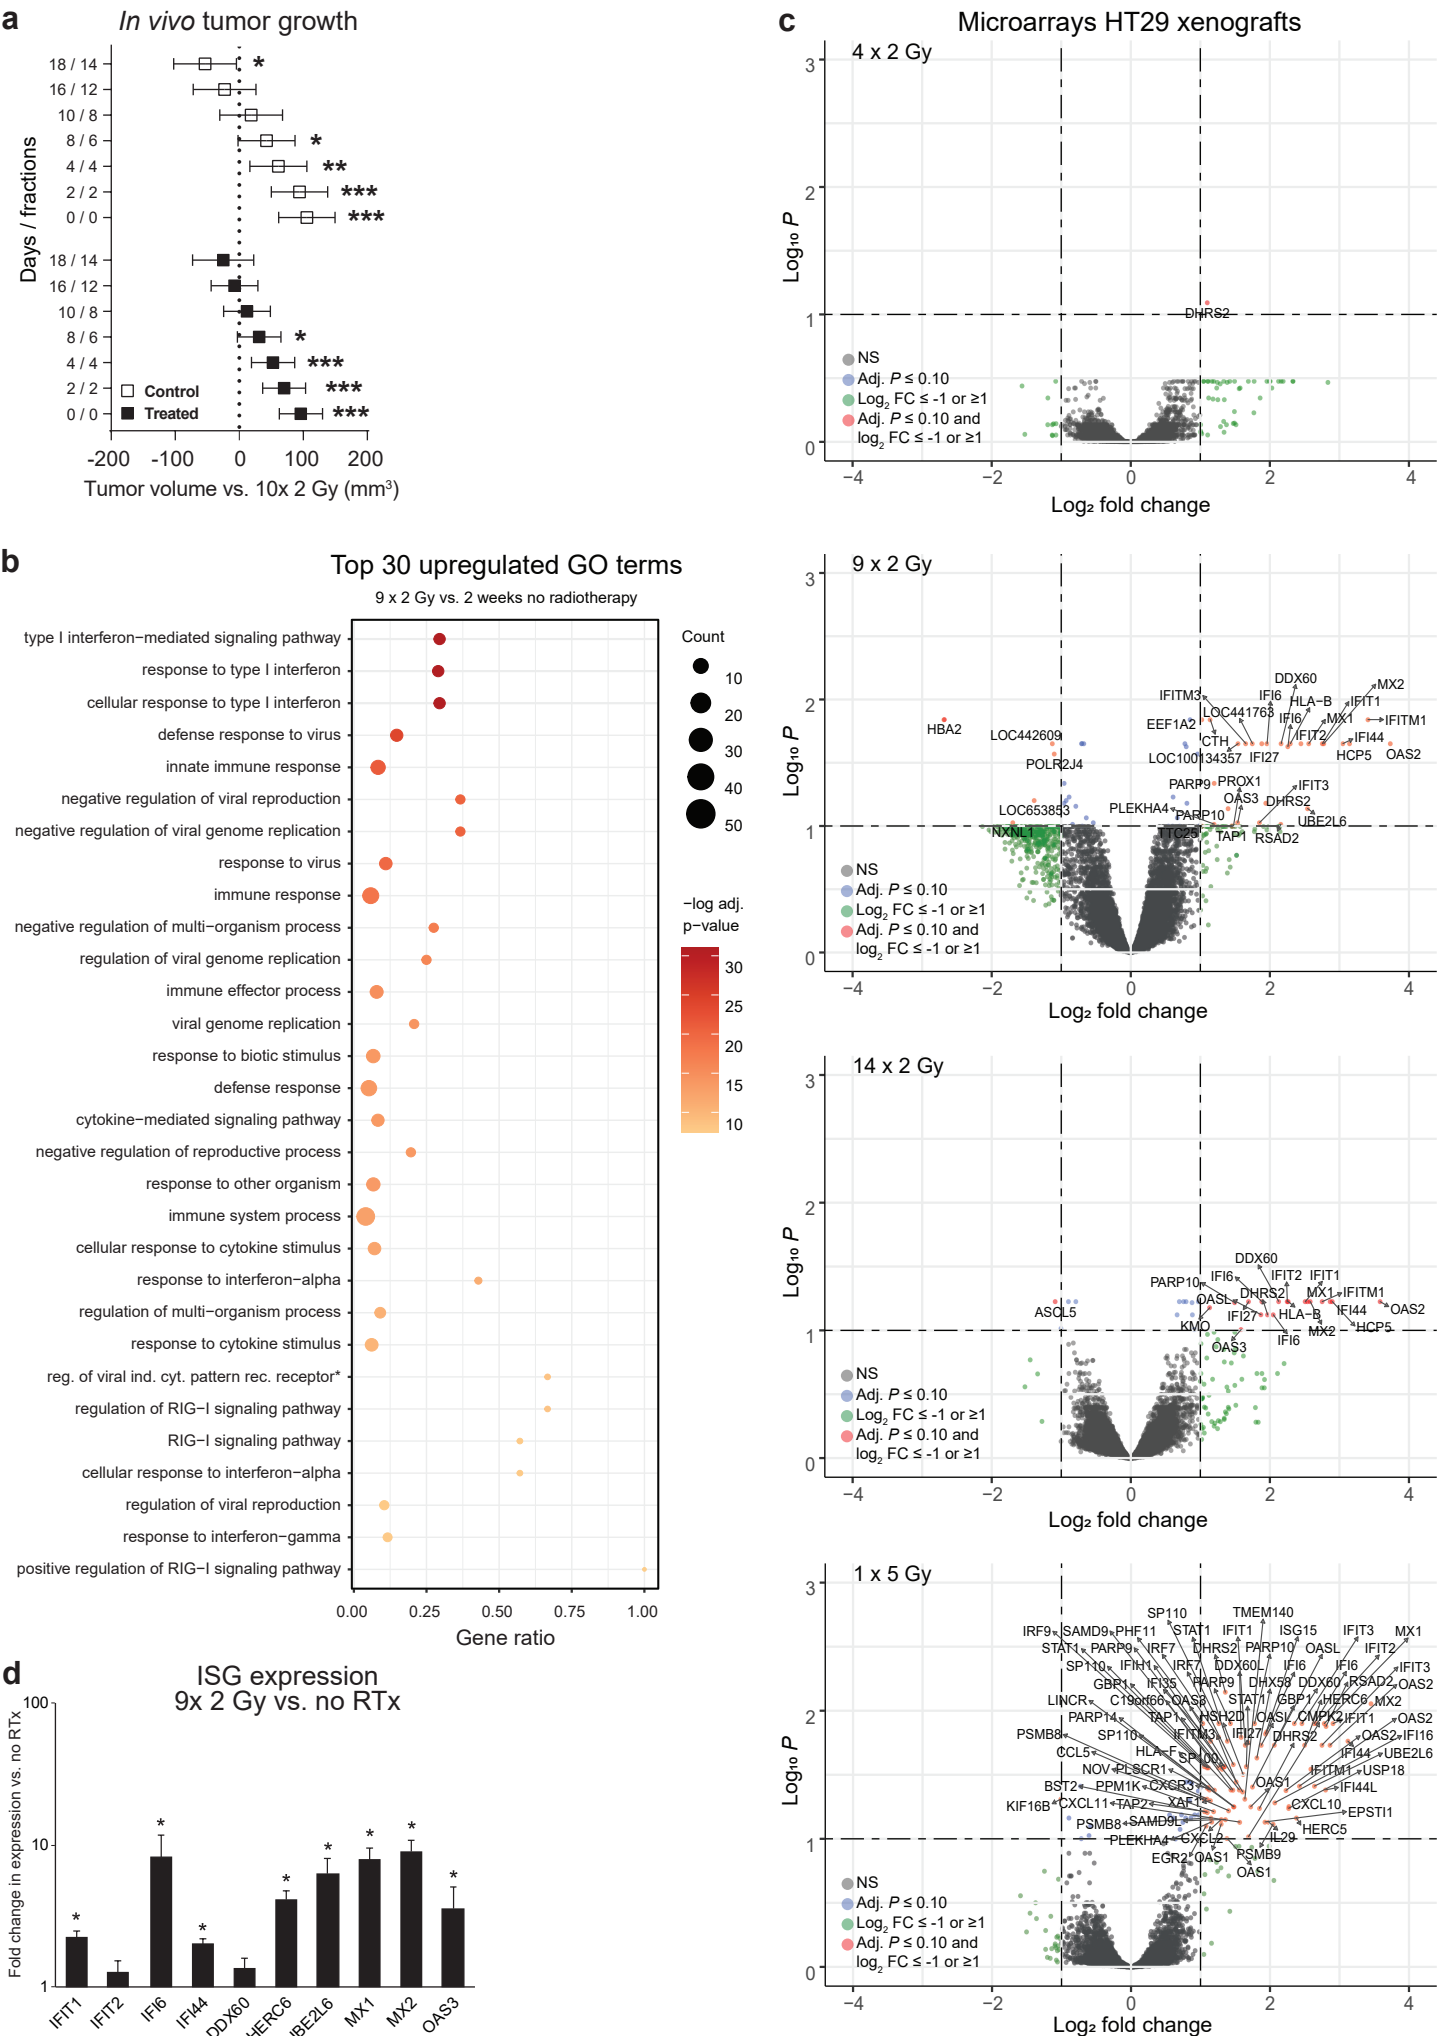

Supplement: Supplementary file 7 [file 27939329]

Supplementary figure S5

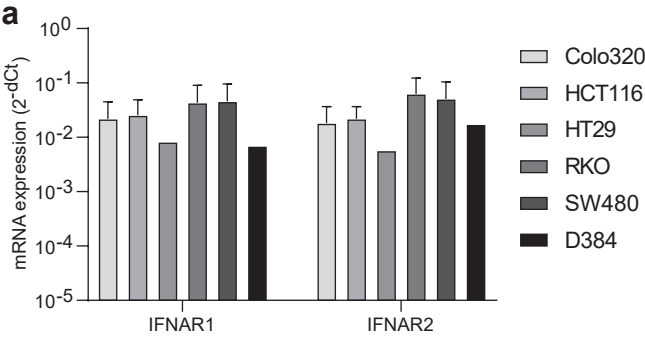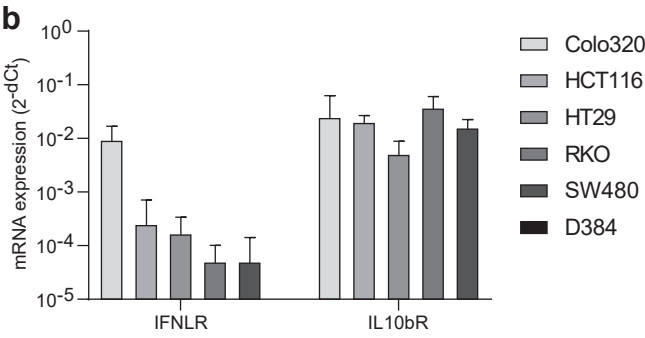

Supplement: Supplementary file 8 [file 27939329]
